1  
2  
3  
4  
5  
6  
7  
8  
9  
10  
11  
12  
13  
14  
15  
16  
17  
18  
19  
20  
21

## TITLE PAGE

### Comparing the value of left atrial strain and HFA-PEFF score in diagnosing heart failure with preserved ejection fraction: a cross-sectional study

Hai Nguyen Ngoc Dang<sup>1,+</sup>, Thang Viet Luong<sup>2,+</sup>, Bang Hai Ho<sup>2</sup>, Tien Anh Hoang<sup>2,\*</sup>, Anh Xuan Mai<sup>3</sup>, Hung Minh Nguyen<sup>4</sup>

<sup>1</sup> The Faculty of Medicine, Duy Tan University, Da Nang, Vietnam

<sup>2</sup> University of Medicine and Pharmacy, Hue University, Hue, Vietnam

<sup>3</sup> Cardiovascular Center, Hue Central Hospital, Hue, Vietnam

<sup>4</sup> Bach Mai Hospital, Ha Noi, Vietnam

<sup>+</sup> These authors contributed equally to this work

#### Corresponding Author:

Tien Anh Hoang

University of Medicine and Pharmacy, Hue University

06 Le Loi Street, Hue city, Thua Thien Hue, 530000, Vietnam

Email address: [hatien@hueuni.edu.vn](mailto:hatien@hueuni.edu.vn)

**Word count: 2,581**

## 22 Abstract

23 **Objectives:** Heart failure with preserved ejection fraction (HFpEF) has a high hospitalization  
24 rate. While recent guidelines recommend specific parameters like E/e', e' velocity, and left atrial  
25 volume index (LAVI) for diagnosing HFpEF, their clinical accuracy remains limited. Left atrial  
26 (LA) strain has emerged as a potential diagnostic parameter, yet its role in the Vietnamese  
27 population is unclear. This study aims to evaluate LA strain's diagnostic role in HFpEF among  
28 Vietnamese patients, exploring its relationship with established parameters of left ventricle (LV)  
29 diastolic function to determine its potential utility as a diagnostic tool.

30 **Methods:** A cross-sectional study was conducted from 15/04/2022 to 01/12/2023, involving 118  
31 subjects, including 49 patients with HFpEF and 69 individuals without cardiac dysfunction. The  
32 study subjects were evaluated for LA strain and HFA-PEFF score. Diagnostic criteria for HFpEF  
33 were based on the 2021 European Society of Cardiology guidelines for diagnosing and treating  
34 acute and chronic heart failure.

35 **Results:** LA strain including LA reservoir (LASr), conduit (LAScd), and contractile (LASct)  
36 functions, in the HFpEF group were 20.80% [26.50 - 13.30],  $9.08 \pm 6.18\%$ , and  $10.89 \pm 5.16\%$ ,  
37 respectively. The control group had corresponding LASr, LAScd, and LASct values of 34.45%  
38 [38.07 - 31.14],  $17.33 \pm 5.72\%$ , and  $17.38 \pm 4.41\%$  ( $p < 0.001$ ). The area under the curve (AUC)  
39 for LASr, LAScd, LAScr, HFA-PEFF score, LAVI, and GLS to diagnose HFpEF was 0.852,  
40 0.770, 0.778, 0.890, 0.615, and 0.701, respectively. Comparing the AUCs for diagnosing HFpEF  
41 between LASr and HFA-PEFF score, no difference was found with  $p = 0.419$ .

42 **Conclusion:** LA strain has a diagnostic value equivalent to the HFA-PEFF score in diagnosing  
43 HFpEF. These indices could be incorporated into the existing guidelines to enhance the diagnosis  
44 of HFpEF.

45 **Keywords:** echocardiography, heart failure, cross-sectional studies, diagnostic imaging,  
46 sensitivity and specificity

## 47 Strengths and limitations of this study

- 48 • The study provides valuable data specific to the Vietnamese population, enhancing the  
49 understanding of heart failure with preserved ejection fraction and potentially leading to  
50 more tailored diagnostic strategies and treatments.
- 51 • This study directly evaluates two diagnostic tools by comparing left atrial strain with the  
52 HFA-PEFF score, which can help clinicians choose the most appropriate method for  
53 diagnosing HFpEF in clinical practice.
- 54 • The inclusion of left atrial strain as a diagnostic metric is relatively novel. It may provide  
55 new insights into the pathophysiology of HFpEF, offering a potential alternative or  
56 complement to existing diagnostic criteria.
- 57 • The findings can have immediate clinical implications, potentially improving the accuracy  
58 of HFpEF diagnosis and leading to better patient outcomes through more precise  
59 treatment plans.

- 60 • Our study has limitations, such as a relatively small sample size, sole location, and  
61 technical constraints. Addressing these limitations through further research will enhance  
62 the robustness and applicability of the findings.

## 63 **Introduction**

64 Heart failure with preserved ejection fraction (HFpEF) is defined as heart failure with an ejection  
65 fraction of 50% or higher at diagnosis, affecting approximately 32 million people worldwide.  
66 Patients with HFpEF are hospitalized about 1.4 times per year and have an annual mortality rate  
67 of around 15%.<sup>1</sup> Left ventricular (LV) diastolic dysfunction plays a fundamental role,  
68 overarching in the pathophysiology of HFpEF.<sup>2</sup>

69 The recent recommendations of the American Society of Echocardiography/European Society of  
70 Cardiovascular Imaging in 2016 used parameters such as E/e', septal e' velocity, lateral e'  
71 velocity, maximum tricuspid valve regurgitation flow (TRV) and left atrial volume index (LAVI)  
72 to evaluate LV diastolic dysfunction as well as to diagnose HFpEF.<sup>3</sup> However, in clinical  
73 practice, the recommendations parameters have limited precision in diagnosing HFpEF.<sup>4</sup>

74 Assessing left atrial (LA) function has recently become critical in cardiac evaluation.<sup>5</sup> The LA  
75 function encompasses three primary aspects: blood storage (reservoir function), blood conduction  
76 (conduit function), and ejection function (contractile function).<sup>6</sup> Commonly used indices to assess  
77 LA function include LAVI and LA size. Increased LAVI is associated with prolonged chronic  
78 LV/LA pressure overload. However, LA size takes time to change, often significantly dilating in  
79 later stages, making LAVI less sensitive in the early stages.<sup>7</sup>

80 LA strain is a novel echocardiographic technique that provides a comprehensive evaluation of  
81 reservoir, conduit, and contractile functions. This method proves particularly valuable when  
82 changes are subtle and challenging to detect using conventional parameters such as LA  
83 dimensions and LAVI.<sup>8</sup> While LA dimensions have been previously utilized, the role of LA  
84 function as a biomarker is increasingly under evaluation, both independently and in conjunction  
85 with LA size. LA strain serves as a tool to assess LA function and can be measured throughout  
86 the cardiac cycle, enabling a thorough and comprehensive evaluation of LA reservoir, conduit,  
87 and contractile functions.<sup>7</sup> Additionally, LA strain offers the advantage of being a technique  
88 mostly independent of angle and less susceptible to influences from mitral annulus calcification  
89 and bundle branch block effects.<sup>9</sup>

90 Notably, impaired LA strain has been observed in HFpEF patients, indicating its potential  
91 diagnostic value.<sup>4 10 11</sup> Studies conducted in the United Kingdom and China have demonstrated  
92 the utility of LA strain in assessing and diagnosing HFpEF.<sup>9 12</sup> However, its role in the  
93 Vietnamese population remains unexplored. Therefore, this study aims to evaluate the diagnostic  
94 role of LA strain in HFpEF among Vietnamese individuals, contributing to a deeper  
95 understanding of its applicability in clinical practice.

## 96 **Materials & Methods**

### 97 **Study Population**

98 The study was conducted by the Declaration of Helsinki, and approved by The Institutional  
99 Ethics Committee of Hue University of Medicine and Pharmacy (Approval number: H2022/034).  
100 From 15/04/2022 to 01/12/2023, we conducted a cross-sectional study that randomly selecting  
101 1014 adults aged 18 and above, who visited the Hue University Hospital for medical  
102 examinations. The study participants were fully informed about the benefits of participating in  
103 the research, and they were only included in the study if they verbally consented during the  
104 interview. After exclusions, we included a total of 118 subjects in the data analysis, comprising  
105 49 individuals diagnosed with HFpEF in the disease group, and 69 individuals without cardiac  
106 dysfunction in the control group. The sampling process is detailed in **Supplementary Figure 1**.  
107 Patients with HFpEF are evaluated according to the standards of ESC in 2021:<sup>13</sup> (1) Symptoms of  
108 heart failure (pulmonary congestion or systemic congestion); (2) Normal LV ejection fraction  
109  $LVEF \geq 50\%$ ; (3) Objective evidence of structural and/or functional cardiac abnormalities  
110 consistent with LV diastolic dysfunction; (4)  $NT\text{-}proBNP \geq 125$  pg/mL. The four recommended  
111 variables for identifying diastolic dysfunction and their abnormal cutoff values are septal  $e' < 7$   
112 cm/s or lateral  $e' < 10$  cm/s, average  $E/e'$  ratio  $> 14$ ,  $LAVI > 34$  mL/m<sup>2</sup>, and  $TRV > 2.8$  m/s. If  
113 more than half of the available parameters met these cutoff values, LV diastolic dysfunction was  
114 considered present. In cases where half of the parameters met the cutoff values (indeterminate),  
115 diastolic dysfunction was assumed to be present if patients had  $E/A > 2.0$  or if  $\geq 2$  of the three  
116 parameters ( $E/e'$  ratio,  $TRV$ , and  $LAVI$ ) met the cutoff values.<sup>14</sup> Exclusion criteria included  
117 patients who declined participation, severe valvular heart disease, heart failure with  $EF < 50\%$ ,  
118 and arrhythmias. Patients with unclear echocardiography images or images lacking clear  
119 visualization of the myocardial endocardial layer were also excluded from the study. The control  
120 group comprised 69 healthy adults undergoing health screening with no history of heart failure.

## 121 **Clinical data collection, laboratory tests, and transthoracic echocardiogram**

122 The clinical data collected included personal and family medical histories and clinical variables  
123 obtained through direct interviews and medical records. N-Terminal pro-B-type natriuretic  
124 peptide (NT-proBNP) levels were measured using a Cobas 8000 analyzer.

125 The echocardiographic procedure followed the American Society of Echocardiography guidelines  
126 for performing a comprehensive transthoracic echocardiographic examination in adults. During  
127 the procedure, the machine recorded the electrocardiogram alongside the echocardiographic  
128 images during the echocardiography procedure. All echocardiograms included in the final data  
129 analysis were performed on patients with normal sinus rhythm.<sup>15</sup>

## 130 **Left atrial and left ventricular strain analysis**

131 Echocardiography images in DICOM format, meeting acceptable image quality standards, were  
132 uploaded to Philips QLAB Cardiovascular ultrasound quantification software Cardiac Analysis  
133 version 15. We conducted LA strain assessment in both the two-chamber and four-chamber  
134 views, setting reference points at the onset of the P wave in the cardiac cycle. Measurements of  
135 LA strain were acquired during the reservoir, conduit, and contractile phases of LA function,  
136 designated as LA strain reservoir function (LASr), LA strain conduit function (LAScd), and LA

137 strain contractile function (LASct), respectively. For LV strain analysis, endocardial borders were  
138 traced on the end-systolic frame in three apical views (4-chamber, 2-chamber, and 3-chamber),  
139 with end-systole defined by the QRS complex or as the smallest LV volume during the cardiac  
140 cycle. The software tracked speckles along the endocardial border and myocardium throughout  
141 the cardiac cycle, automatically computing peak longitudinal strain and generating regional data  
142 from six segments, as well as an average value for each view. For patients with sinus rhythm,  
143 analyses were performed on a single cardiac cycle; for those with atrial fibrillation, strain values  
144 were calculated as the average of three cardiac cycles.<sup>16</sup> One strain specialist in the core  
145 laboratory, who was blinded to the patients' other data, performed all strain measurements.  
146 LV and LA strain results are conventionally represented as negative values. However, for  
147 convenience in analysis and display, we utilized the absolute values of these results. The detailed  
148 methodology is illustrated in **Supplementary Figure 2**.

#### 149 **Calculation of the HFA-PEFF score**

150 The Heart Failure Association-PEFF (HFA-PEFF) score comprises functional, morphological,  
151 and biomarker domains (**Supplementary Table 1**). A patient can score zero, minor (1 point), or  
152 major (2 points) for each domain, and then those subscores are summed to produce a total score  
153 that ranges from 0 to 6 points. The total score is classified as low likelihood (0 – 1 point),  
154 intermediate likelihood (2 – 4 points), and high likelihood (5 – 6 points).<sup>17</sup>

#### 155 **Statistics**

156 We performed all statistical analyses using SPSS Version 26 (IBM, New York, United States),  
157 MedCalc Software Version 22.019 (MedCalc Software, Ostend, Belgium), and GraphPad Prism  
158 Version 10 (GraphPad Software, Boston, United States). Continuous variables were presented as  
159 mean  $\pm$  standard deviation for normally distributed variables, as determined by the Kolmogorov-  
160 Smirnov test. Non-normally distributed variables were expressed as median values with  
161 interquartile ranges (25th-75th percentile). Categorical variables were reported as frequencies and  
162 percentages. We assessed intergroup differences in categorical variables using Fisher's exact test,  
163 while differences in continuous variables were analyzed using the unpaired T-test or the Mann-  
164 Whitney U test, as appropriate. To assess the correlations between echocardiographic indices,  
165 NT-proBNP, and HFA-PEFF score, we used Spearman's correlation coefficient ( $r_s$ ). The area  
166 under the curve (AUC) was determined using the Wilson/Brown method to diagnose HFpEF. We  
167 conducted AUC comparisons to assess the diagnostic value of strain compared to existing  
168 guideline criteria, employing the DeLong method.<sup>18</sup> We randomly selected ten subjects from the  
169 control group and ten from the disease group to evaluate the intraclass correlation coefficient  
170 (ICC). The intraobserver and interobserver variability of LASr, LAScd, and LASct were assessed  
171 using the ICC and coefficient of variation. For intraobserver variability, the same operator  
172 independently remeasured the data after a 2-week interval. A second operator, blinded to the  
173 initial measurements, reanalyzed the data for interobserver variability. All statistical tests were  
174 two-sided, and a P-value of  $< 0.05$  was considered significant.

## 175 **Results**

### 176 **Baseline characteristics**

177 **Table 1** displays age, sex, BSA, and BMI between the control and disease group, showing no  
178 statistically significant differences. The NT-proBNP concentration in the HFpEF group exhibited  
179 a non-normal distribution, with a median of 663.20 pg/mL (Quartile: 286.55 pg/mL – 1417.00  
180 pg/mL). Additionally, LA strain indices in the HFpEF group were lower than in the control  
181 group, with all differences being statistically significant. Further details are illustrated in **Table 1**.

### 182 **Correlation analysis of the left atrial strains**

183 **Figure 1** depicts the correlation between echocardiography indices, NT-proBNP, and HFA-PEFF  
184 score. LASr, LAScd, and LASct showed an inverse correlation with the HFA-PEFF score and  
185 NT-proBNP while also correlating with measured cardiac function indices. **Figure 1**  
186 demonstrates detailed parameters.

### 187 **The value of the left atrial strains and other echocardiographic parameters in diagnosing 188 HFpEF**

189 **Table 2** illustrates that the indices LASr (AUC = 0.852), LAScd (AUC = 0.770), LASct (AUC =  
190 0.778), HFA-PEFF score (AUC = 0.890) exhibit high accuracy in diagnosing HFpEF. The cutoff  
191 points, sensitivity, and specificity of LASr are 29.85%, 83.67%, and 82.61%, respectively.  
192 Further detailed information is presented in **Table 2**.

193 **Table 3** reveals the area under the ROC curve for diagnosing HFpEF of HFA-PEFF score and  
194 LASr, showing no difference ( $p = 0.419$ ). Moreover, the AUC of conventional echocardiographic  
195 indices (LAVI,  $E/e'$ ,  $e'$ , TRV) with HFA-PEFF score and LASr differed significantly. Further  
196 detailed information is provided in **Table 3**.

### 197 **Reliability of the left atrial strain measurements**

198 **Figure 2** presents the intraobserver and interobserver variability for LA strain measurements. The  
199 parameters LASr, LAScd, and LASct demonstrated good reproducibility, indicated by high ICC  
200 values.

## 201 **Discussion**

202 In this study, we evaluate the role of LA strain in diagnosing HFpEF. LA function indices such as  
203 LASr, LAScd, and LASct decreased significantly in the HFpEF group compared to the control  
204 group, with a  $p$ -value  $< 0.001$ . This finding is consistent with Aung et al.'s (2017) study on 83  
205 patients, which also reported decreased LASr and LASct in the HFpEF group compared to the  
206 control group.<sup>19</sup> Similar results were observed in several other studies where LASr, LAScd, and  
207 LASct were all reduced in HFpEF patients compared to the control group.<sup>9 12 20 21</sup> Therefore, our  
208 study confirms a significant decline in LA function in the HFpEF group compared to healthy  
209 subjects. Reddy et al. also highlighted the critical role of the LA in the progression of HFpEF.  
210 They suggested that LA strain reflects the overall LA function, which progressively deteriorates  
211 in chronic LV diastolic dysfunction, such as in patients with HFpEF.<sup>9</sup>

212 The American Echocardiography Association and the European Association of Cardiovascular  
213 Imaging (ASE/EACVI) recommended using echocardiography to diagnose HFpEF in patients



214 with sinus rhythm using E/A ratio, LAVI, TRV, and E/e'.<sup>3</sup> The ESC guidelines for the diagnosis  
215 of HFpEF are based on evidence of functional and structural alterations of the heart using the  
216 parameters E/e', LVM, LAVI, septal e' velocity, and lateral e' velocity.<sup>14</sup> However, these classic  
217 indicators still have many limitations, and many clinical practice cases encounter difficulties  
218 when the diagnosis falls into the "undetermined" state, when Doppler measurements cannot be  
219 made, such as tachycardia or severe mitral valve disease.<sup>22</sup> Compared with Doppler  
220 echocardiography, the advantage of speckle tracking echocardiography when compared to  
221 conventional echocardiography is that it is independent of angle and less affected by mitral valve  
222 disease. On the other hand, the LA strain evaluates the function of the LA throughout the entire  
223 cardiac cycle rather than the functional state of a certain time point in the cardiac cycle.<sup>4</sup> In our  
224 study, LA strain indices including LASr (AUC = 0.852), LAScd (AUC = 0.770), and LASct  
225 (AUC = 0.778) have high values in diagnosing HFpEF equivalent to the score HFA-PEFF score  
226 (AUC = 0.890). At the same time, the ability of LASr to diagnose HFpEF was superior to the  
227 LAVI (AUC = 0.615), E/e' (AUC = 0.636), septal e' velocity (AUC = 0.590), and TRV (AUC =  
228 0.633) with  $p < 0.05$ . Many studies have also shown the superiority of LA strain indices in  
229 diagnosing HFpEF compared to commonly used classical indices.<sup>9 23 24</sup>  
230 HFA-PEFF is a widely used scoring system for diagnosing HFpEF. However, evaluating this  
231 scoring system requires numerous parameters, including echocardiography, NT-proBNP, and  
232 atrial fibrillation diagnosis.<sup>17 25</sup> Our study shows that LA strain indices have demonstrated an  
233 AUC equivalent to the HFA-PEFF score. When comparing the AUC of LASr and HFA-PEFF  
234 score, our study found no significant difference in the HFpEF diagnostic value of LASr and  
235 HFA-PEFF score with  $p = 0.419$ . The 5-point HFA-PEFF score has 100% specificity, however,  
236 the sensitivity is low at only 26.53%, which can cause difficulties in applying this score in  
237 clinical practice.  
238 In conclusion, LA parameters on speckle tracking echocardiography may be useful in diagnosing  
239 HFpEF. Integration into the 2016 EACVI/ASE criteria will improve diagnostic effectiveness with  
240 accuracy not inferior to conventional echocardiographic parameters.

## 241 **Limitations of the study**

242 First, our study exclusively compares non-invasive indices for diagnosing HFpEF and refrains  
243 from using invasive interventions for evaluation or comparison with other invasive indices. We  
244 employed only one strain-analysis software platform and did not compare different software  
245 programs. Second, the speckle tracking echocardiography study was challenging due to image  
246 processing requirements, which led to the exclusion of many participants with incomplete data.  
247 This potential selection bias could impact the generalizability of our findings. Third, while our  
248 sample size for analysis is more significant than that of some studies, it remains relatively small. More  
249 extensive studies are necessary to establish cutoff points relevant to clinical practice in Central  
250 Vietnam. Additionally, we conducted our study at a single location, which may limit the  
251 generalizability of our findings to other populations or settings. Variations in disease prevalence  
252 and characteristics across different populations or geographical locations could influence study

253 outcomes. Fourth, during sample collection, technical limitations of Doppler echocardiography  
254 may have prevented us from obtaining all possible Doppler echocardiography indices for  
255 comparison with LA strain indices. Fifth, this study focused exclusively on subjects in sinus  
256 rhythm. However, atrial fibrillation represents a significant risk factor for HFpEF, necessitating  
257 further research to determine the optimal integration of LA strain parameters with conventional  
258 parameters for HFpEF diagnosis.

## 259 **Conclusions**

260 The LA strain demonstrates diagnostic efficacy comparable to the HFA-PEFF score in  
261 diagnosing HFpEF. Integrating these indices into current guidelines could enhance future HFpEF  
262 diagnostics.

## 263 **Acknowledgments**

264 Not applicable.

## 265 **Author Contributions**

266 Hai Nguyen Ngoc Dang: Conceptualization, Methodology, Acquisition, Investigation, Data  
267 curation, Writing – original draft, Writing – review & editing.

268 Thang Viet Luong: Conceptualization, Methodology, Acquisition, Investigation, Data curation,  
269 Writing – original draft, Writing – review & editing.

270 Bang Hai Ho: Conceptualization, Acquisition, Writing – original draft.

271 Tien Anh Hoang: Conceptualization, Acquisition, Writing – original draft.

272 Anh Xuan Mai: Conceptualization, Acquisition, Writing – original draft.

273 Hung Minh Nguyen: Conceptualization, Acquisition, Writing – original draft.

274 All authors have read and agreed to the published version of the manuscript.

## 275 **Funding Statement**

276 This research was not funded by any specific grant from public, commercial, or not-for-profit  
277 organizations.

## 278 **Competing Interests Statement**

279 The authors declare that the research was conducted in the absence of any commercial or  
280 financial relationships that could be construed as a potential conflict of interest.



## 281 Data Sharing Statement

282 Data cannot be shared publicly due to certain local ethical constraints. Researchers who meet the  
283 criteria for access to confidential data may contact the author, Hai Nguyen Ngoc Dang (via email  
284 at ngochai123dc@gmail.com).

## 285 References

- 286 1. Redfield M.M., Borlaug B.A. Heart Failure With Preserved Ejection Fraction: A Review.  
287 *JAMA* 2023; 329: 827.
- 288 2. Obokata M., Reddy Y.N.V., Borlaug B.A. Diastolic Dysfunction and Heart Failure With  
289 Preserved Ejection Fraction. *JACC: Cardiovascular Imaging* 2020; 13: 245–257.
- 290 3. Nagueh S.F., Smiseth O.A., Appleton C.P., et al. Recommendations for the Evaluation of  
291 Left Ventricular Diastolic Function by Echocardiography: An Update from the American  
292 Society of Echocardiography and the European Association of Cardiovascular Imaging.  
293 *Journal of the American Society of Echocardiography* 2016; 29: 277–314.
- 294 4. Ma C., Liao Y., Fan J., et al. The novel left atrial strain parameters in diagnosing of heart  
295 failure with preserved ejection fraction. *Echocardiography* 2022; 39: 416–425.
- 296 5. Boe E., Smiseth O.A. Left atrial strain imaging: ready for clinical implementation in heart  
297 failure with preserved ejection fraction. *European Heart Journal - Cardiovascular Imaging*  
298 2022; 23: 1169–1170.
- 299 6. Rosca M., Lancellotti P., Popescu B.A., et al. Left atrial function: pathophysiology,  
300 echocardiographic assessment, and clinical applications. *Heart* 2011; 97: 1982–1989.
- 301 7. Gan G.C.H., Ferkh A., Boyd A., et al. Left atrial function: evaluation by strain analysis.  
302 *Cardiovasc Diagn Ther* 2018; 8: 29–46.
- 303 8. Jarasunas J., Aidielis A., Aidielis S. Left atrial strain - an early marker of left ventricular  
304 diastolic dysfunction in patients with hypertension and paroxysmal atrial fibrillation.  
305 *Cardiovasc Ultrasound* 2018; 16: 29.
- 306 9. Reddy Y.N.V., Obokata M., Egbe A., et al. Left atrial strain and compliance in the  
307 diagnostic evaluation of heart failure with preserved ejection fraction. *European J of Heart*  
308 *Fail* 2019; 21: 891–900.
- 309 10. Brand A., Romero Dorta E., Wolf A., et al. Phasic left atrial strain to predict worsening of  
310 diastolic function: Results from the prospective Berlin Female Risk Evaluation follow-up  
311 trial. *Front Cardiovasc Med* 2023; 10: 1070450.
- 312 11. Kim D., Seo J.H., Choi K.H., et al. Prognostic Implications of Left Atrial Stiffness Index in  
313 Heart Failure Patients With Preserved Ejection Fraction. *JACC: Cardiovascular Imaging*  
314 2023; 16: 435–445.
- 315 12. Rimbasi R.C., Visoiu I.S., Magda S.L., et al. New insights into the potential utility of the left  
316 atrial function analysis in heart failure with preserved ejection fraction diagnosis. *PLoS*  
317 *ONE* 2022; 17: e0267962.
- 318 13. McDonagh T.A., Metra M., Adamo M., et al. 2021 ESC Guidelines for the diagnosis and  
319 treatment of acute and chronic heart failure. *European Heart Journal* 2021; 42: 3599–3726.
- 320 14. Ponikowski P., Voors A.A., Anker S.D., et al. 2016 ESC Guidelines for the diagnosis and  
321 treatment of acute and chronic heart failure: The Task Force for the diagnosis and treatment  
322 of acute and chronic heart failure of the European Society of Cardiology (ESC). Developed

- 323 with the special contribution of the Heart Failure Association (HFA) of the ESC. *European*  
324 *J of Heart Fail* 2016; 18: 891–975.
- 325 15. Mitchell C., Rahko P.S., Blauwet L.A., et al. Guidelines for Performing a Comprehensive  
326 Transthoracic Echocardiographic Examination in Adults: Recommendations from the  
327 American Society of Echocardiography. *Journal of the American Society of*  
328 *Echocardiography* 2019; 32: 1–64.
- 329 16. Park J.J., Hwang I., Kang S., et al. Myocardial strain for heart failure with preserved ejection  
330 fraction but without diastolic dysfunction. *ESC Heart Failure* 2022; 9: 3308–3316.
- 331 17. Pieske B., Tschöpe C., De Boer R.A., et al. How to diagnose heart failure with preserved  
332 ejection fraction: the HFA–PEFF diagnostic algorithm: a consensus recommendation from  
333 the Heart Failure Association (HFA) of the European Society of Cardiology (ESC).  
334 *European Heart Journal* 2019; 40: 3297–3317.
- 335 18. DeLong E.R., DeLong D.M., Clarke-Pearson D.L. Comparing the areas under two or more  
336 correlated receiver operating characteristic curves: a nonparametric approach. *Biometrics*  
337 1988; 44: 837–845.
- 338 19. Aung S.M., Güler A., Güler Y., et al. Left atrial strain in heart failure with preserved ejection  
339 fraction. *Herz* 2017; 42: 194–199.
- 340 20. Obokata M., Negishi K., Kurosawa K., et al. Incremental Diagnostic Value of LA Strain  
341 With Leg Lifts in Heart Failure With Preserved Ejection Fraction. *JACC: Cardiovascular*  
342 *Imaging* 2013; 6: 749–758.
- 343 21. Ye Z., Miranda W.R., Yeung D.F., et al. Left Atrial Strain in Evaluation of Heart Failure  
344 with Preserved Ejection Fraction. *Journal of the American Society of Echocardiography*  
345 2020; 33: 1490–1499.
- 346 22. Dzhioeva O., Belyavskiy E. Diagnosis and Management of Patients with Heart Failure with  
347 Preserved Ejection Fraction (HFpEF): Current Perspectives and Recommendations. *TCRM*  
348 2020; Volume 16: 769–785.
- 349 23. Braunauer K., Dungen H.-D., Belyavskiy E., et al. Potential usefulness and clinical relevance  
350 of a novel left atrial filling index to estimate left ventricular filling pressures in patients with  
351 preserved left ventricular ejection fraction. *European Heart Journal - Cardiovascular*  
352 *Imaging* 2020; 21: 260–269.
- 353 24. Lin J., Ma H., Gao L., et al. Left atrial reservoir strain combined with E/E' as a better single  
354 measure to predict elevated LV filling pressures in patients with coronary artery disease.  
355 *Cardiovasc Ultrasound* 2020; 18: 11.
- 356 25. Choi K.H., Yang J.H., Seo J.H., et al. Discriminative Role of Invasive Left Heart  
357 Catheterization in Patients Suspected of Heart Failure With Preserved Ejection Fraction.  
358 *JAHA* 2023; 12: e027581.

359

360 **Figure Legends**

361 **Figure 1. Heatmap depicts the correlation between echocardiography indices, NT-ProBNP,**  
362 **and HFA-PEFF.** A: A-wave velocity; E: E-wave velocity; e': e'-wave velocity; HFA-PEFF:  
363 Heart Failure Association-PEFF; LAScd: left atrial conduit function; LASct: left atrial contractile  
364 function; LASr: left atrial reservoir function; LAVI: left atrial volume index; LV GLS: left  
365 ventricular global longitudinal strain; NT-proBNP: N-terminal pro-B-type natriuretic peptide;  
366 TRV: tricuspid regurgitation velocity.

367 **Figure 2. Reliability of LA strain measurements.** LAScd: left atrial conduit function; LASct:  
368 left atrial contractile function; LASr: left atrial reservoir function; ICC: Intraclass correlation  
369 coefficient.  
370

371 **Table 1:**  
372 **General characteristics of study subjects.**

| Characteristics                                   | Control group<br>(n = 69) | HFpEF group<br>(n = 49)  | p-value |
|---------------------------------------------------|---------------------------|--------------------------|---------|
| <b>Baseline demographic and clinical features</b> |                           |                          |         |
| Age (years)                                       | 60 [56 - 65]              | 62 [52 - 73]             | 0.204   |
| Female                                            | 37 (53.62)                | 27 (55.10)               | 0.512   |
| BSA (m <sup>2</sup> )                             | 1.55 ± 0.13               | 1.52 ± 0.16              | 0.357   |
| BMI (kg/m <sup>2</sup> )                          | 21.92 ± 2.03              | 21.71 ± 3.54             | 0.710   |
| NT-ProBNP (pg/mL)                                 | 64.0 [43.5 - 78.0]        | 663.0 [286.6 - 1417.0]   | < 0.001 |
| <b>Left ventricular structure and function</b>    |                           |                          |         |
| LVMI (g/m <sup>2</sup> )                          | 91.35 [79.38 - 115.49]    | 123.00 [106.50 - 146.50] | < 0.001 |
| RWT                                               | 0.39 [0.35 - 0.44]        | 0.39 [0.35 - 0.45]       | 0.761   |
| LV EF (%)                                         | 70.22 ± 6.38              | 63.38 ± 8.22             | < 0.001 |
| LV GLS (%)                                        | 20.80 [19.60 - 22.05]     | 16.80 [12.40 - 19.15]    | < 0.001 |
| <b>Doppler echocardiography</b>                   |                           |                          |         |
| e' septal velocity (cm/s)                         | 7.35 [6.29 - 7.98]        | 6.19 [4.70 - 7.76]       | 0.010   |
| e' lateral velocity (cm/s)                        | 8.80 [8.11 - 10.85]       | 7.70 [5.36 - 9.72]       | 0.005   |
| E/A ratio                                         | 0.78 [0.69 - 0.92]        | 0.87 [0.70 - 1.30]       | 0.249   |
| Average E/e ratio                                 | 7.82 [6.47 - 9.59]        | 11.81 [9.05 - 14.86]     | 0.002   |
| TRV (cm/s)                                        | 115.00 [94.65 - 143.00]   | 238.00 [166.50 - 296.10] | < 0.001 |
| <b>Left atrial structure and function</b>         |                           |                          |         |
| LAVI (mL/m <sup>2</sup> )                         | 18.30 [16.70 - 22.15]     | 24.00 [16.65 - 33.50]    | 0.002   |
| LASr (%)                                          | 34.45 [38.07 - 31.14]     | 20.80 [26.50 - 13.30]    | < 0.001 |
| LASct (%)                                         | 17.33 ± 5.72              | 9.08 ± 6.18              | < 0.001 |
| LAScd (%)                                         | 17.38 ± 4.41              | 10.89 ± 5.16             | < 0.001 |
| LASr/LAVI                                         | 1.89 ± 0.53               | 0.95 ± 0.89              | < 0.001 |
| LASr/E/e'                                         | 4.53 ± 1.41               | 1.91 ± 1.29              | < 0.001 |
| <b>HFA-PEFF score</b>                             |                           |                          |         |
| HFA-PEFF score                                    | 2 [2 - 3]                 | 4 [3 - 5]                | <0.001  |

373 Note:

374 Values are presented as mean ± standard deviation or number (%) or median [IQR, 25th-75th  
375 percentile].

376 A, A-wave velocity; BMI, body mass index; BSA, body surface area; E, E-wave velocity; e', e'-  
377 wave velocity; LAScd, left atrial conduit function; LASct, left atrial contractile function; LASr,  
378 left atrial reservoir function; LAVI, left atrial volume index; LV EF, left ventricular ejection  
379 fraction; LV GLS, left ventricular global longitudinal strain; LVMI, left ventricular mass index;  
380 NT-proBNP, N-terminal pro-B-type natriuretic peptide; RWT, relative wall thickness; TRV,  
381 tricuspid regurgitation velocity.

382

383 **Table 2:**

384 **The performance of the LA strain parameters and existing criteria in diagnosing HFpEF.**

| Parameters                       | AUC   | 95%CI |       | p-value | Cut-off point | Sensitivity (%) | Specificity (%) |
|----------------------------------|-------|-------|-------|---------|---------------|-----------------|-----------------|
| <b>LAVI (mL/m<sup>2</sup>)</b>   | 0.615 | 0.521 | 0.703 | 0.034   | 34            | 24.49           | 98.55           |
| <b>Average E/e'</b>              | 0.636 | 0.542 | 0.722 | 0.012   | 14            | 28.57           | 98.55           |
| <b>Septal e' velocity (cm/s)</b> | 0.590 | 0.496 | 0.680 | 0.091   | 7             | 57.14           | 60.87           |
| <b>TRV (m/s)</b>                 | 0.633 | 0.539 | 0.720 | 0.014   | 2.8           | 26.53           | 100.00          |
| <b>LV GLS (%)</b>                | 0.701 | 0.610 | 0.782 | < 0.001 | 16            | 48.98           | 91.30           |
| <b>LASr (%)</b>                  | 0.852 | 0.775 | 0.911 | < 0.001 | 29.85         | 83.67           | 82.61           |
| <b>LAScd (%)</b>                 | 0.770 | 0.683 | 0.842 | < 0.001 | 11.70         | 59.18           | 85.51           |
| <b>LASct (%)</b>                 | 0.778 | 0.692 | 0.849 | < 0.001 | 15.58         | 77.55           | 69.57           |
| <b>HFA-PEFF score</b>            | 0.890 | 0.819 | 0.940 | < 0.001 | 5             | 26.53           | 100.00          |
| <b>LASr/LAVI</b>                 | 0.838 | 0.759 | 0.899 | < 0.001 | 1.21          | 71.43           | 86.96           |
| <b>LASr/E/e'</b>                 | 0.886 | 0.814 | 0.937 | < 0.001 | 2.96          | 81.63           | 84.06           |

385 Note:

386 E: E-wave velocity; e': e'-wave velocity; HFA-PEFF: Heart Failure Association-PEFF; LAScd:  
 387 left atrial conduit function; LASct: left atrial contractile function; LASr: left atrial reservoir  
 388 function; LAVI: left atrial volume index; LV GLS: left ventricular global longitudinal strain;  
 389 TRV: tricuspid regurgitation velocity.

390

392  
393  
394

**Table 3:**  
Correlation matrix with p values between AUC values of variables.

| Variables | LAVI           | E/e'           | Septal e'      | TRV            | LV GLS        | LASr          | LAScd         | LASct         | HFA-PEFF | LASr/LAVI |
|-----------|----------------|----------------|----------------|----------------|---------------|---------------|---------------|---------------|----------|-----------|
| E/e'      | 0.787          |                |                |                |               |               |               |               |          |           |
| Septal e' | 0.736          | 0.483          |                |                |               |               |               |               |          |           |
| TRV       | 0.817          | 0.967          | 0.572          |                |               |               |               |               |          |           |
| LV GLS    | 0.174          | 0.365          | 0.115          | 0.334          |               |               |               |               |          |           |
| LASr      | <b>0.000**</b> | <b>0.000**</b> | <b>0.000**</b> | <b>0.000*</b>  | <b>0.013*</b> |               |               |               |          |           |
| LAScd     | <b>0.023*</b>  | <b>0.046*</b>  | <b>0.008*</b>  | <b>0.039*</b>  | 0.298         | <b>0.003*</b> |               |               |          |           |
| LASct     | <b>0.018*</b>  | <b>0.031*</b>  | <b>0.005*</b>  | <b>0.029*</b>  | 0.229         | 0.073         | 0.867         |               |          |           |
| HFA-PEFF  | <b>0.000**</b> | <b>0.000**</b> | <b>0.000**</b> | <b>0.000**</b> | <b>0.001*</b> | 0.419         | <b>0.021*</b> | <b>0.033*</b> |          |           |
| LASr/LAVI | <b>0.000**</b> | <b>0.001*</b>  | <b>0.000**</b> | <b>0.001*</b>  | <b>0.031*</b> | 0.649         | 0.083         | 0.191         | 0.283    |           |
| LASr/E/e' | <b>0.000**</b> | <b>0.000**</b> | <b>0.000**</b> | <b>0.000**</b> | <b>0.002*</b> | 0.258         | <b>0.003*</b> | <b>0.011*</b> | 0.928    | 0.180     |

Note:

Statistically significant values are in bold. \*\* p < 0.001, \* p < 0.05.

E: E-wave velocity; e': e' -wave velocity; LAScd: left atrial conduit function; LASct: left atrial contractile function; LASr: left atrial reservoir function; LAVI: left atrial volume index; LV GLS: left ventricular global longitudinal strain; TRV: tricuspid regurgitation velocity.



395 **Supplementary Figure 1**

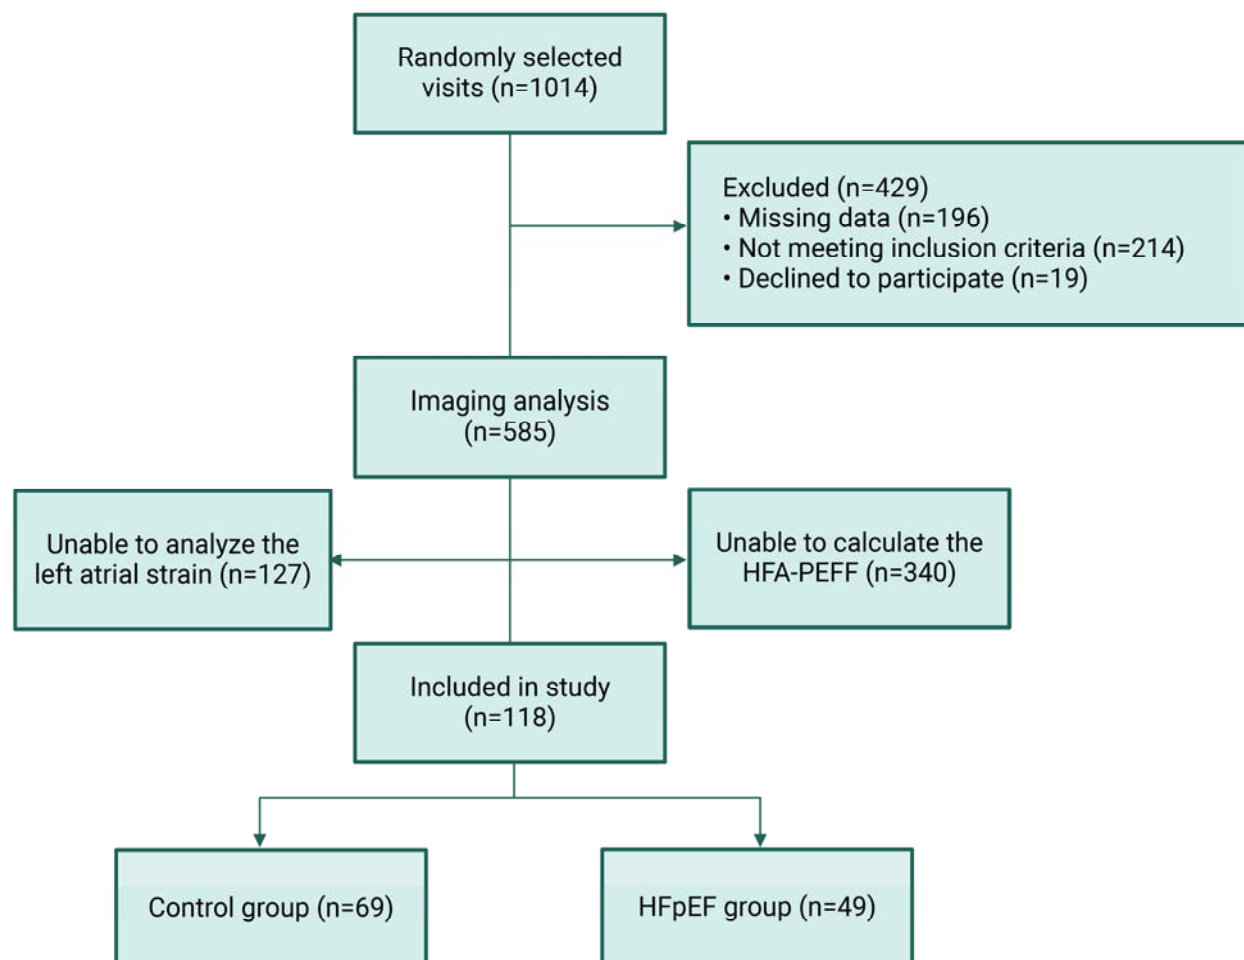

396  
397 **Supplementary Figure 1. Flowchart illustrating the sample selection and exclusion process.**

398

399 **Supplementary Figure 2**

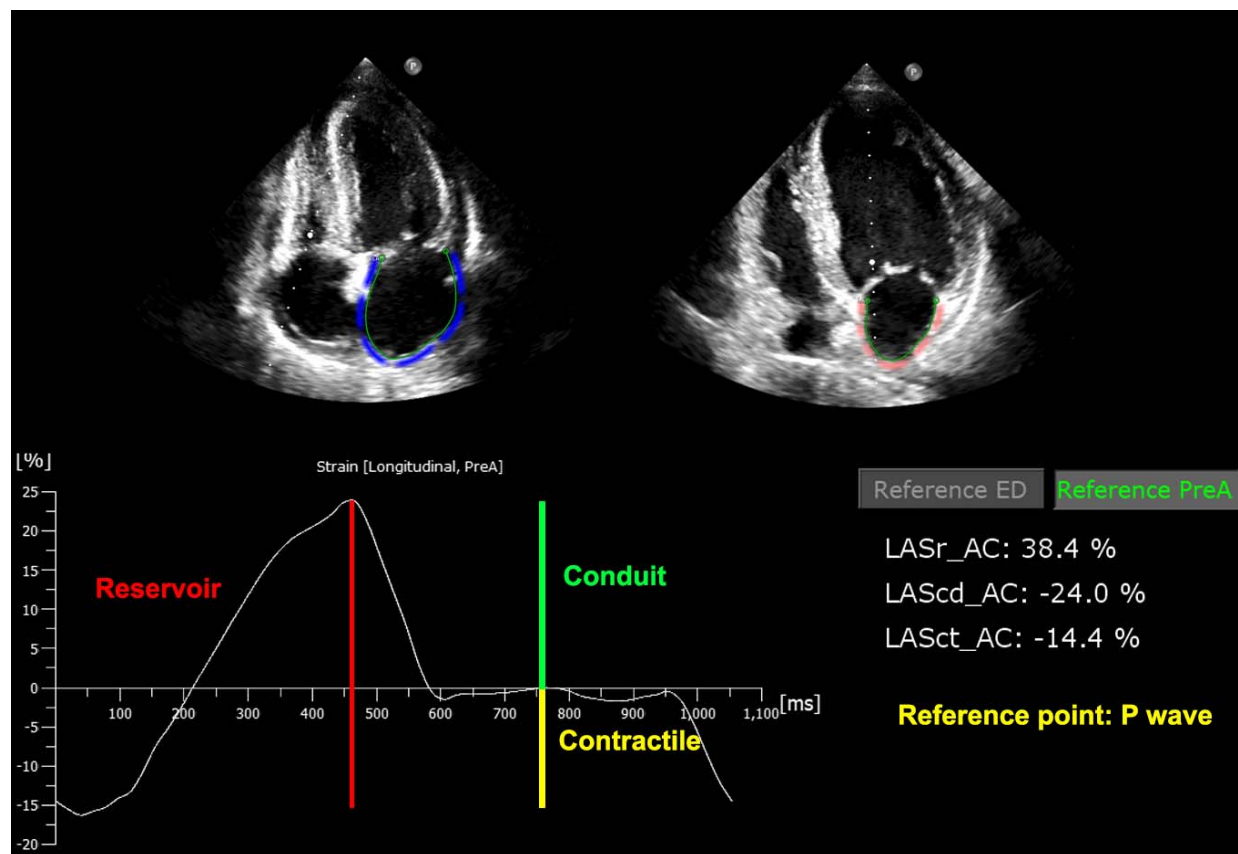

400  
401 **Supplementary Figure 2. Parameters of LA strain on speckle tracking echocardiography.**  
402 LASr (Reservoir) in red, LAScd (Conduit) in green, and LASct (Contractile) in yellow. LAScd:  
403 left atrial conduit function; LASct: left atrial contractile function; LASr: left atrial reservoir  
404 function.

405

406 **Supplementary Table 1. Calculation of HFA-PEFF score**

| <b>HFA-PEFF score</b> |                                                                                                                                          |              |                                                                                                                        |              |
|-----------------------|------------------------------------------------------------------------------------------------------------------------------------------|--------------|------------------------------------------------------------------------------------------------------------------------|--------------|
| <b>Parameter</b>      | <b>Minor</b>                                                                                                                             |              | <b>Major</b>                                                                                                           |              |
|                       | <b>Value</b>                                                                                                                             | <b>Point</b> | <b>Value</b>                                                                                                           | <b>Point</b> |
| <b>Functional</b>     | Average E/e' 9 - 14<br>or<br>GLS < 16%                                                                                                   | 1            | Septal e' < 7 cm/s or lateral e' < 10 cm/s<br>or<br>Average E/e' ≥ 15<br>or<br>TR velocity > 280 cm/s (PASP > 35 mmHg) | 2            |
| <b>Morphological</b>  | LAVI 29 – 34 mL/m <sup>2</sup><br>or<br>LVMI ≥ 115/95 g/m <sup>2</sup> (female/male)<br>or<br>RWT > 0.42<br>or LV wall thickness ≥ 12 mm | 1            | LAVI > 34mL/m <sup>2</sup><br>or<br>LVMI ≥ 149/122 g/m <sup>2</sup> (female/male)<br>and RWT > 0.42                    | 2            |
| <b>Biomarker (SR)</b> | NT-proBNP 125 - 220 pg/mL<br>or<br>BNP 35 - 80 pg/mL                                                                                     | 1            | NT-proBNP > 220 pg/mL<br>or<br>BNP > 80 pg/mL                                                                          | 2            |
| <b>Biomarker (AF)</b> | NT-proBNP 365 - 660 pg/mL<br>or<br>BNP 105 - 240 pg/mL                                                                                   | 1            | NT-proBNP > 660 pg/mL<br>or<br>BNP > 240 pg/mL                                                                         | 2            |

407 *Adapted from Heart Failure Association of the European Society of Cardiology*

408 Abbreviations: AF: atrial fibrillation; BNP: B-type natriuretic peptide; E: early transmitral flow  
 409 velocity; e': early diastolic mitral annular velocity; GLS: left ventricular global longitudinal  
 410 strain; HFA-PEFF: Heart Failure Association-PEFF; LAVI: left atrial volume index; LV: left  
 411 ventricle; LVMI: left ventricular mass index; NT-proBNP: N-terminal pro-B-type natriuretic  
 412 peptide; PASP: pulmonary artery systolic pressure; RWT: relative wall thickness; SR: sinus  
 413 rhythm; TRV: tricuspid regurgitation velocity.

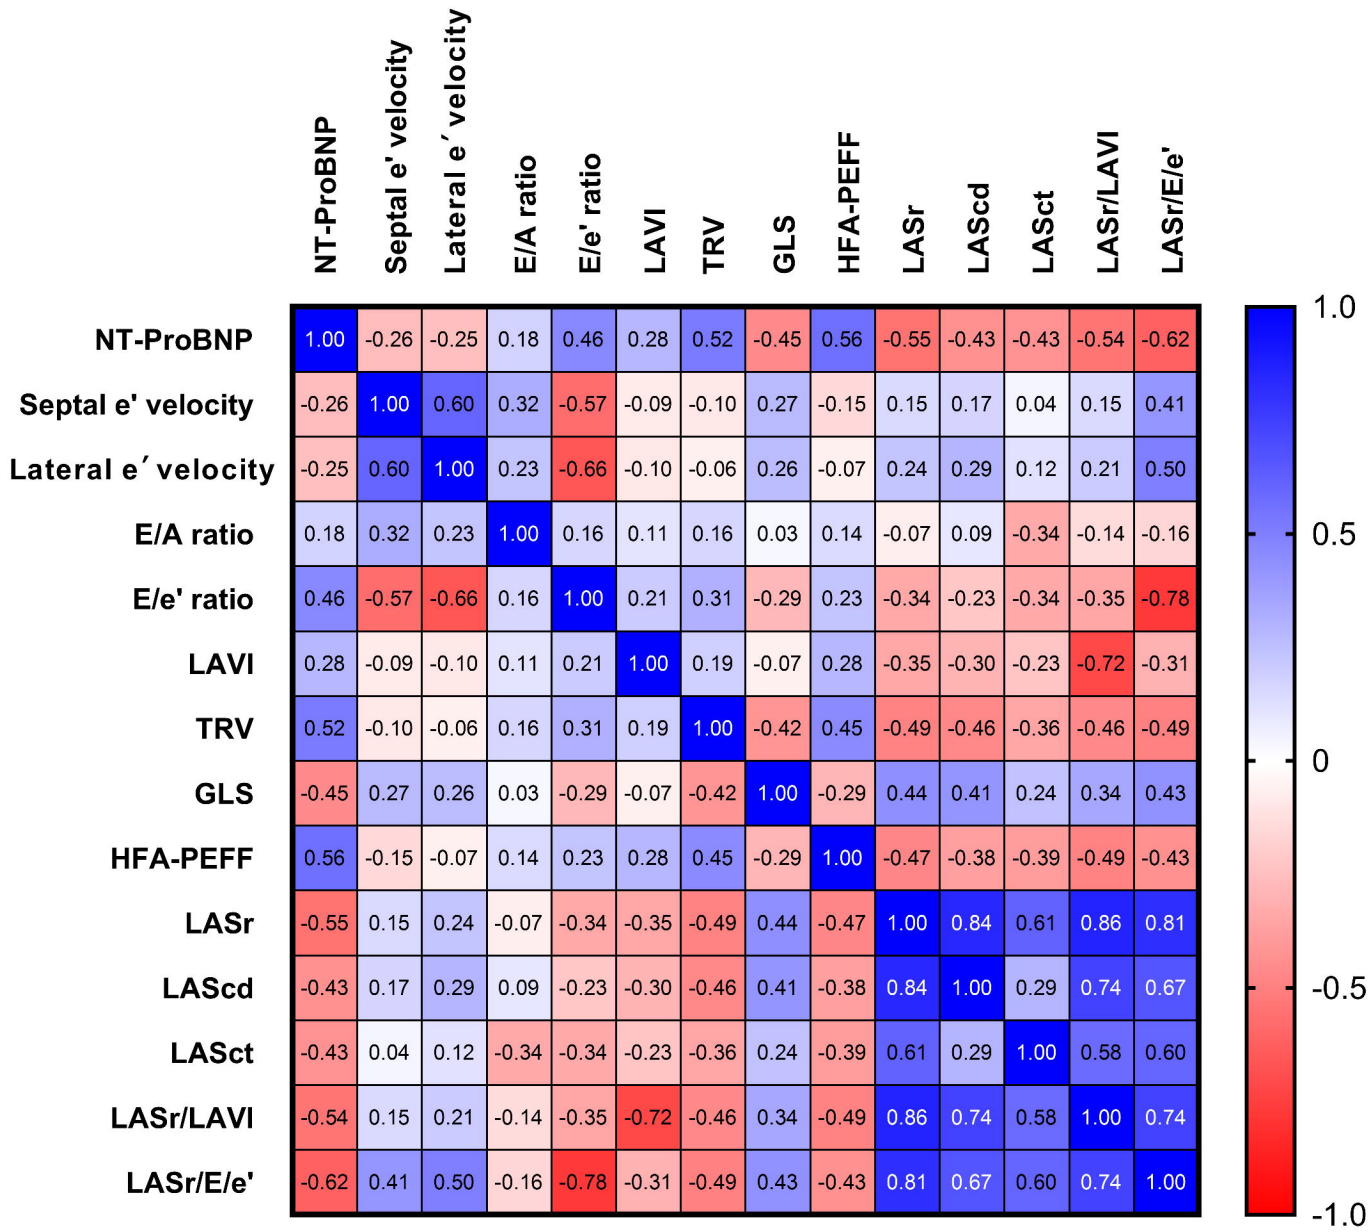

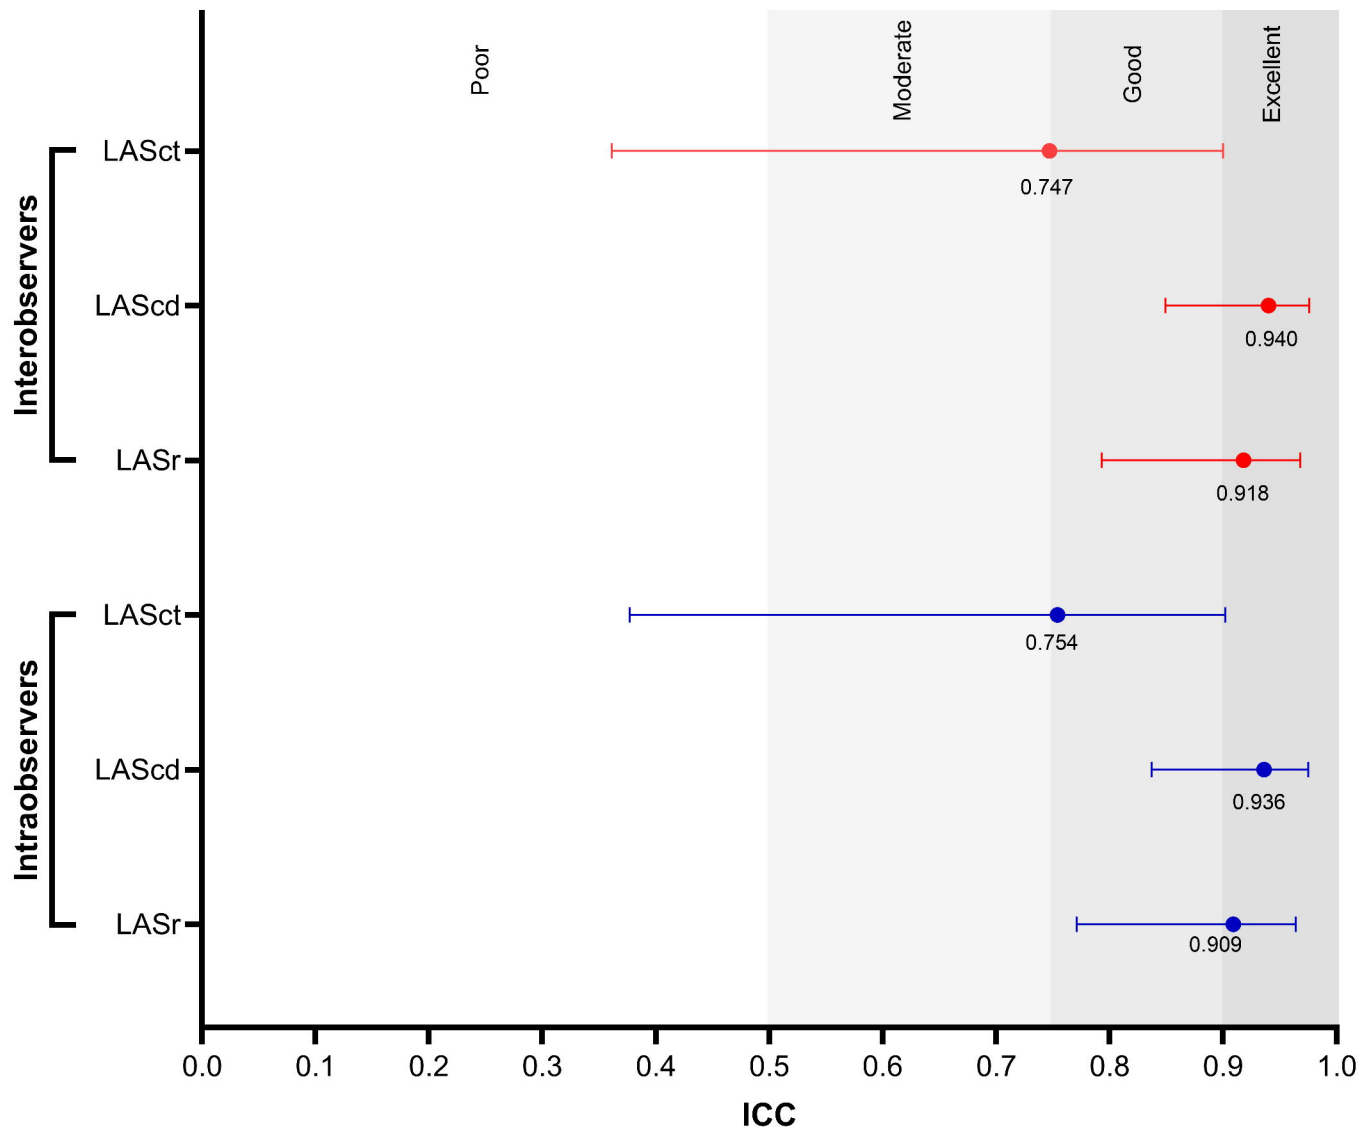

**Table 1:**  
**General characteristics of study subjects.**

| Characteristics                                   | Control group<br>(n = 69) | HFpEF group<br>(n = 49)  | p-value |
|---------------------------------------------------|---------------------------|--------------------------|---------|
| <b>Baseline demographic and clinical features</b> |                           |                          |         |
| Age (years)                                       | 60 [56 - 65]              | 62 [52 - 73]             | 0.204   |
| Female                                            | 37 (53.62)                | 27 (55.10)               | 0.512   |
| BSA (m <sup>2</sup> )                             | 1.55 ± 0.13               | 1.52 ± 0.16              | 0.357   |
| BMI (kg/m <sup>2</sup> )                          | 21.92 ± 2.03              | 21.71 ± 3.54             | 0.710   |
| NT-ProBNP (pg/mL)                                 | 64.0 [43.5 - 78.0]        | 663.0 [286.6 - 1417.0]   | < 0.001 |
| <b>Left ventricular structure and function</b>    |                           |                          |         |
| LVMI (g/m <sup>2</sup> )                          | 91.35 [79.38 - 115.49]    | 123.00 [106.50 - 146.50] | < 0.001 |
| RWT                                               | 0.39 [0.35 - 0.44]        | 0.39 [0.35 - 0.45]       | 0.761   |
| LV EF (%)                                         | 70.22 ± 6.38              | 63.38 ± 8.22             | < 0.001 |
| LV GLS (%)                                        | 20.80 [19.60 - 22.05]     | 16.80 [12.40 - 19.15]    | < 0.001 |
| <b>Doppler echocardiography</b>                   |                           |                          |         |
| e' septal velocity (cm/s)                         | 7.35 [6.29 - 7.98]        | 6.19 [4.70 - 7.76]       | 0.010   |
| e' lateral velocity (cm/s)                        | 8.80 [8.11 - 10.85]       | 7.70 [5.36 - 9.72]       | 0.005   |
| E/A ratio                                         | 0.78 [0.69 - 0.92]        | 0.87 [0.70 - 1.30]       | 0.249   |
| Average E/e ratio                                 | 7.82 [6.47 - 9.59]        | 11.81 [9.05 - 14.86]     | 0.002   |
| TRV (cm/s)                                        | 115.00 [94.65 - 143.00]   | 238.00 [166.50 - 296.10] | < 0.001 |
| <b>Left atrial structure and function</b>         |                           |                          |         |
| LAVI (mL/m <sup>2</sup> )                         | 18.30 [16.70 - 22.15]     | 24.00 [16.65 - 33.50]    | 0.002   |
| LASr (%)                                          | 34.45 [38.07 - 31.14]     | 20.80 [26.50 - 13.30]    | < 0.001 |
| LASct (%)                                         | 17.33 ± 5.72              | 9.08 ± 6.18              | < 0.001 |
| LAScd (%)                                         | 17.38 ± 4.41              | 10.89 ± 5.16             | < 0.001 |
| LASr/LAVI                                         | 1.89 ± 0.53               | 0.95 ± 0.89              | < 0.001 |
| LASr/E/e'                                         | 4.53 ± 1.41               | 1.91 ± 1.29              | < 0.001 |
| <b>HFA-PEFF score</b>                             |                           |                          |         |
| HFA-PEFF score                                    | 2 [2 - 3]                 | 4 [3 - 5]                | <0.001  |

Note:

Values are presented as mean ± standard deviation or number (%) or median [IQR, 25th-75th percentile].

A, A-wave velocity; BMI, body mass index; BSA, body surface area; E, E-wave velocity; e', e'-wave velocity; LAScd, left atrial conduit function; LASct, left atrial contractile function; LASr, left atrial reservoir function; LAVI, left atrial volume index; LV EF, left ventricular ejection fraction; LV GLS, left ventricular global longitudinal strain; LVMI, left ventricular mass index; NT-proBNP, N-terminal pro-B-type natriuretic peptide; RWT, relative wall thickness; TRV, tricuspid regurgitation velocity.



**Table 2:**

**The performance of the LA strain parameters and existing criteria in diagnosing HFpEF.**

| <b>Parameters</b>                | <b>AUC</b> | <b>95%CI</b> |       | <b>p-value</b> | <b>Cut-off point</b> | <b>Sensitivity (%)</b> | <b>Specificity (%)</b> |
|----------------------------------|------------|--------------|-------|----------------|----------------------|------------------------|------------------------|
| <b>LAVI (mL/m<sup>2</sup>)</b>   | 0.615      | 0.521        | 0.703 | 0.034          | 34                   | 24.49                  | 98.55                  |
| <b>Average E/e'</b>              | 0.636      | 0.542        | 0.722 | 0.012          | 14                   | 28.57                  | 98.55                  |
| <b>Septal e' velocity (cm/s)</b> | 0.590      | 0.496        | 0.680 | 0.091          | 7                    | 57.14                  | 60.87                  |
| <b>TRV (m/s)</b>                 | 0.633      | 0.539        | 0.720 | 0.014          | 2.8                  | 26.53                  | 100.00                 |
| <b>LV GLS (%)</b>                | 0.701      | 0.610        | 0.782 | < 0.001        | 16                   | 48.98                  | 91.30                  |
| <b>LASr (%)</b>                  | 0.852      | 0.775        | 0.911 | < 0.001        | 29.85                | 83.67                  | 82.61                  |
| <b>LAScd (%)</b>                 | 0.770      | 0.683        | 0.842 | < 0.001        | 11.70                | 59.18                  | 85.51                  |
| <b>LASct (%)</b>                 | 0.778      | 0.692        | 0.849 | < 0.001        | 15.58                | 77.55                  | 69.57                  |
| <b>HFA-PEFF score</b>            | 0.890      | 0.819        | 0.940 | < 0.001        | 5                    | 26.53                  | 100.00                 |
| <b>LASr/LAVI</b>                 | 0.838      | 0.759        | 0.899 | < 0.001        | 1.21                 | 71.43                  | 86.96                  |
| <b>LASr/E/e'</b>                 | 0.886      | 0.814        | 0.937 | < 0.001        | 2.96                 | 81.63                  | 84.06                  |

Note:

E: E-wave velocity; e': e'-wave velocity; HFA-PEFF: Heart Failure Association-PEFF; LAScd: left atrial conduit function; LASct: left atrial contractile function; LASr: left atrial reservoir function; LAVI: left atrial volume index; LV GLS: left ventricular global longitudinal strain; TRV: tricuspid regurgitation velocity.

**Table 3:**

**Correlation matrix with p values between AUC values of variables.**

| Variables | LAVI           | E/e'           | Septal e'      | TRV            | LV GLS        | LASr          | LAScd         | LASct         | HFA-PEFF | LASr/LAVI |
|-----------|----------------|----------------|----------------|----------------|---------------|---------------|---------------|---------------|----------|-----------|
| E/e'      | 0.787          |                |                |                |               |               |               |               |          |           |
| Septal e' | 0.736          | 0.483          |                |                |               |               |               |               |          |           |
| TRV       | 0.817          | 0.967          | 0.572          |                |               |               |               |               |          |           |
| LV GLS    | 0.174          | 0.365          | 0.115          | 0.334          |               |               |               |               |          |           |
| LASr      | <b>0.000**</b> | <b>0.000**</b> | <b>0.000**</b> | <b>0.000*</b>  | <b>0.013*</b> |               |               |               |          |           |
| LAScd     | <b>0.023*</b>  | <b>0.046*</b>  | <b>0.008*</b>  | <b>0.039*</b>  | 0.298         | <b>0.003*</b> |               |               |          |           |
| LASct     | <b>0.018*</b>  | <b>0.031*</b>  | <b>0.005*</b>  | <b>0.029*</b>  | 0.229         | 0.073         | 0.867         |               |          |           |
| HFA-PEFF  | <b>0.000**</b> | <b>0.000**</b> | <b>0.000**</b> | <b>0.000**</b> | <b>0.001*</b> | 0.419         | <b>0.021*</b> | <b>0.033*</b> |          |           |
| LASr/LAVI | <b>0.000**</b> | <b>0.001*</b>  | <b>0.000**</b> | <b>0.001*</b>  | <b>0.031*</b> | 0.649         | 0.083         | 0.191         | 0.283    |           |
| LASr/E/e' | <b>0.000**</b> | <b>0.000**</b> | <b>0.000**</b> | <b>0.000**</b> | <b>0.002*</b> | 0.258         | <b>0.003*</b> | <b>0.011*</b> | 0.928    | 0.180     |

Note:

Statistically significant values are in bold. \*\* p < 0.001, \* p < 0.05.

E: E-wave velocity; e': e'-wave velocity; LAScd: left atrial conduit function; LASct: left atrial contractile function; LASr: left atrial reservoir function; LAVI: left atrial volume index; LV GLS: left ventricular global longitudinal strain; TRV: tricuspid regurgitation velocity.
